# Supplementary material
Source: HighWire-hosted journal article supplement (https://www.jpn.ca/highwire/filestream/89513/field_highwire_adjunct_files/0/jpn-170214-1-at.pdf)
Supplement: jpn-170214-1-at.pdf [file jpn-170214-1-at.pdf]

**Appendix 1** to Suo X, Lei D, Li L, et al. Psychoradiological patterns of small-world properties and a systematic review of connectome studies of patients with 6 major psychiatric disorders. *J Psychiatry Neurosci* 2018.

DOI: 10.1503/jpn.170214

Copyright © 2018 The Author(s) or their employer(s). To receive this resource in an accessible format, please contact us at [cmajgroup@cmaj.ca](mailto:cmajgroup@cmaj.ca).

*Online appendices are unedited and posted as supplied by the authors.*

**Table S1.** Studies investigating the functional and structural connectome in schizophrenia.

| Study                                 | Participants | Age of patients | Medication                | Global signal regression | Modality/ MR Scanner | Node definition  | Node number | Edge definition     | Network type | Segregation |          |           | Integration |           |            | Small-worldness alteration |                             |
|---------------------------------------|--------------|-----------------|---------------------------|--------------------------|----------------------|------------------|-------------|---------------------|--------------|-------------|----------|-----------|-------------|-----------|------------|----------------------------|-----------------------------|
|                                       |              |                 |                           |                          |                      |                  |             |                     |              | $C_p$       | $\gamma$ | $E_{loc}$ | $L_p$       | $\lambda$ | $E_{glob}$ |                            | $\sigma$                    |
| Liu et al. <sup>51</sup> (2016)       | 96P vs 91C   | 33.6±8.6        | 89 Medication             | NA                       | ASL/3T               | AAL              | 90          | Pearson correlation | W            | NA          | ↓        | ↓         | NA          | =         | =          | ↓                          | Randomization               |
| Zhu et al. <sup>48</sup> (2016)       | 26PFS vs 26C | 32.5±7.0        | Medication                | Yes                      | fMRI/3T              | AAL              | 90          | Pearson correlation | B            | =           | ↓        | ↓         | =           | =         | =          | ↓                          | Randomization               |
|                                       | 26PFS vs 26C | 32.5±7.0        | Medication                | No                       | fMRI/3T              | AAL              | 90          | Pearson correlation | B            | =           | ↓        | ↓         | =           | ↓         | =          | =                          | Randomization               |
|                                       | 26PSS vs 26C | 32.7±7.0        | Medication                | Yes                      | fMRI/3T              | AAL              | 90          | Pearson correlation | B            | =           | =        | =         | =           | =         | =          | =                          | Randomization               |
|                                       | 26PSS vs 26C | 32.7±7.0        | Medication                | No                       | fMRI/3T              | AAL              | 90          | Pearson correlation | B            | =           | =        | ↓         | =           | =         | =          | =                          | Randomization               |
| Hadley et al. <sup>61</sup> (2016)    | 32P vs 32C   | 33.6±10.4       | Medication-free ≥ 10 days | No                       | fMRI/3T              | Functional atlas | 278         | Wavelet correlation | W            | ↑           | NA       | NA        | NA          | NA        | ↓          | NA                         | Regularization              |
| Yu et al. <sup>60</sup> (2015)        | 82P vs 82C   | 38.0±14.0       | Medication                | NA                       | fMRI/3T              | ICA              | 48          | Pearson correlation | W            | ↓           | NA       | NA        | NA          | NA        | ↓          | NA                         | Weaker small-worldization   |
| Su et al. <sup>20</sup> (2015)        | 49P vs 28C   | 38.4±13.4       | Medication                | NA                       | fMRI/3T              | AAL              | 90          | Pearson correlation | NA           | NA          | NA       | =         | NA          | NA        | ↓          | NA                         | Regularization              |
| Lo et al. <sup>52</sup> (2015)        | 25P vs 29C   | 36.6±13.8       | Medication                | NA                       | fMRI/3T              | AAL              | 585         | Wavelet correlation | B            | ↓           | NA       | NA        | NA          | NA        | ↑          | ↓                          | Randomization               |
| Sheffield et al. <sup>59</sup> (2015) | 46P vs 54C   | 34.1±11.5       | 44 Medication, 2 NA       | Yes                      | fMRI/3T              | FreeSurfer       | 264         | Pearson correlation | W            | NA          | NA       | ↓         | NA          | NA        | ↓          | NA                         | Weaker small-worldization   |
| Yu et al. <sup>63</sup> (2013)        | 23P vs 23C   | 32±9            | Medication                | NA                       | fMRI/3T              | ICA              | 42          | Correlation         | W            | ↑           | NA       | NA        | NA          | NA        | ↑          | NA                         | Stronger small-worldization |
| Ma et al. <sup>15</sup> (2012)        | 28P vs 28C   | 37.8±12.3       | Medication                | NA                       | fMRI/3T/task         | ICA              | 60          | HOSD                | B            | ↓           | NA       | NA        | ↑           | NA        | NA         | ↓                          | Weaker small-worldization   |
|                                       | 28P vs 28C   | 37.8±12.3       | Medication                | NA                       | fMRI/3T/rest         | ICA              | 60          | HOSD                | B            | ↓           | NA       | NA        | ↓           | NA        | NA         | ↓                          | Randomization               |
| Li et al. <sup>62</sup> (2012)        | 21P vs 36C   | 36.7±9.3        | Medication                | Yes                      | fMRI/1.5T            | AAL              | 64          | Pearson correlation | B            | NA          | NA       | ↑         | NA          | NA        | ↓          | NA                         | Regularization              |
| He et al. <sup>17</sup> (2012)        | 35P vs 32C   | 34.3±11.8       | Medication                | NA                       | fMRI/1.5T+3T         | ICA              | 105         | Partial correlation | B            | ↓           | NA       | ↓         | =           | NA        | =          | NA                         | Randomization               |
| Yu et al. <sup>55</sup> (2011)        | 24P vs 24C   | 35.9±12.1       | Medication                | NA                       | fMRI/3T              | ICA              | 57          | Pearson correlation | W            | ↓           | NA       | NA        | NA          | NA        | NA         | NA                         | Randomization               |
| Yu et al. <sup>21</sup> (2011)        | 19P vs 19C   | 36.5±11.1       | Medication                | NA                       | fMRI/3T              | ICA              | 57          | Partial correlation | B            | ↑           | =        | ↑         | ↑           | =         | ↓          | =                          | Regularization              |
| Yu et al. <sup>49</sup> (2011)        | 20P vs 20C   | 36.7            | Medication                | NA                       | fMRI/3T/left         | ICA              | 95          | Partial correlation | B            | =           | ↓        | =         | ↑           | =         | ↓          | ↓                          | Weaker small-worldization   |
|                                       | 20P vs 20C   | 36.7            | Medication                | NA                       | fMRI/3T/right        | ICA              | 95          | Partial correlation | B            | =           | ↓        | =         | =           | =         | =          | ↓                          | Randomization               |

**Appendix 1** to Suo X, Lei D, Li L, et al. Psychoradiological patterns of small-world properties and a systematic review of connectome studies of patients with 6 major psychiatric disorders. *J Psychiatry Neurosci* 2018.

DOI: 10.1503/jpn.170214

*Online appendices are unedited and posted as supplied by the authors.*

|                                             |                |             |                              |     |             |            |           |                            |    |    |    |    |    |    |    |    |                           |
|---------------------------------------------|----------------|-------------|------------------------------|-----|-------------|------------|-----------|----------------------------|----|----|----|----|----|----|----|----|---------------------------|
| Wang et al. <sup>54</sup> (2010)            | 23P vs 33C     | 30.0±9.2    | Medication                   | NA  | fMRI/3T     | AAL        | 90        | Partial correlation        | B  | NA | NA | ↓  | NA | NA | =  | NA | Randomization             |
| Lynall et al. <sup>53</sup> (2010)          | 12P vs 15C     | 32.8±9.2    | Medication                   | NA  | fMRI/1.5T   | AAL        | 72        | Wavelet correlation        | B  | ↓  | NA | NA | NA | NA | ↑  | ↓  | Randomization             |
| Alexander-Bloch et al. <sup>50</sup> (2010) | 13P vs 19C     | 18±4        | NA                           | NA  | fMRI/1.5T   | HOA        | 100       | Wavelet correlation        | B  | ↓  | NA | ↓  | NA | NA | ↑  | =  | Randomization             |
| Liu et al. <sup>58</sup> (2008)             | 31P vs 31C     | 24±6        | 21 Medication, 10 Drug-naive | NA  | fMRI/1.5T   | AAL        | 90        | Partial correlation        | B  | ↓  | =  | ↓  | ↑  | =  | ↓  | =  | Weaker small-worldization |
| Alexander-Bloch et al. <sup>56</sup> (2013) | 19P vs 20C     | 18.7±4.9    | Medication                   | NA  | fMRI/1.5T   | HOA        | 293       | Wavelet correlation        | NA | ↓  | NA | NA | NA | NA | ↑  | NA | Randomization             |
| Fornito et al. <sup>64</sup> (2011)         | 23P vs 25C     | 20.45 ±4.36 | 16 Medication, 7 Drug-naive  | NA  | fMRI/1.5T   | AAL        | 78        | Pearson correlation        | B  | NA | =  | =  | NA | =  | =  | =  |                           |
| Tomasi et al. <sup>57</sup> (2014)          | 69P vs 74C     | 38±14       | NA                           | NA  | fMRI/3T     | Voxelwise  | 3 mm      | Pearson correlation        | B  | ↓  | NA | NA | ↓  | NA | NA | =  | Randomization             |
|                                             |                |             |                              |     |             |            | isotropic |                            |    |    |    |    |    |    |    |    |                           |
| Zhu et al. <sup>16</sup> (2016)             | 35P+AVH vs 50C | 31.5±7.7    | Medication                   | Yes | fMRI/3T     | AAL        | 90        | Pearson correlation        | W  | ↓  | =  | ↓  | ↑  | =  | ↓  | =  | Weaker small-worldization |
|                                             | 41P-AVH vs 50C | 32.3±5.7    | Medication                   | Yes | fMRI/3T     | AAL        | 90        | Pearson correlation        | W  | ↓  | =  | ↓  | ↑  | =  | ↓  | =  | Weaker small-worldization |
|                                             | 35P+AVH vs 50C | 31.5±7.7    | Medication                   | -   | DTI/3T      | AAL        | 90        | Deterministic tractography | W  | =  | =  | =  | ↑  | =  | =  | =  | Regularization            |
|                                             | 41P-AVH vs 50C | 32.3±5.7    | Medication                   | -   | DTI/3T      | AAL        | 90        | Deterministic tractography | W  | =  | =  | =  | =  | =  | =  | =  |                           |
| Yeo et al. <sup>72</sup> (2016)             | 80P vs 116C    | 34.6±10.6   | Medication                   | -   | DTI/1.5T&3T | DKA        | 82        | Deterministic tractography | W  | =  | NA | =  | ↑  | NA | =  | NA | Regularization            |
| Sun et al. <sup>69</sup> (2016)             | 31P vs 28C     | 31.9±9.7    | Medication                   | -   | DTI/3T      | AAL        | 90        | Deterministic tractography | W  | =  | NA | =  | ↑  | NA | ↓  | =  | Regularization            |
| Hu et al. <sup>79</sup> (2016)              | 42P vs 38C     | 24.9±4.8    | Drug-naive                   | -   | DTI/3T      | AAL        | 90        | Deterministic tractography | W  | NA | =  | =  | NA | =  | =  | =  |                           |
| Zhang et al. <sup>77</sup> (2015)           | 30P vs 34C     | 24.8±6.2    | Drug-naive                   | -   | DTI/1.5T    | AAL        | 90        | Deterministic tractography | W  | NA | NA | ↓  | ↑  | NA | ↓  | =  | Weaker small-worldization |
| Yan et al. <sup>76</sup> (2015)             | 19P vs 24C     | 23.4±4.4    | Medication                   | -   | DTI/3T      | AAL        | 90        | Deterministic tractography | W  | NA | NA | ↓  | NA | NA | ↓  | NA | Weaker small-worldization |
| Griffa et al. <sup>66</sup> (2015)          | 16P vs 15C     | 42.0±10.1   | 14 Medication                | -   | DSI/3T      | DKA        | 82        | Deterministic tractography | W  | NA | NA | NA | NA | NA | ↓  | NA | Regularization            |
| Sun et al. <sup>70</sup> (2017)             | 116P vs 66C    | 33.0±9.2    | Medication                   | -   | DTI/3T      | AAL        | 90        | Deterministic tractography | W  | =  | NA | =  | ↑  | NA | ↓  | =  | Regularization            |
| Chen et al. <sup>65</sup> (2015)            | 24P vs 24C     | 29.2±6.8    | Medication                   | -   | DTI/3T      | AAL        | 90        | Deterministic tractography | W  | NA | NA | NA | ↑  | NA | NA | NA | Regularization            |
| Kim et al. <sup>67</sup> (2014)             | 25P vs 36C     | 31.8±10.7   | NA                           | -   | DTI/3T      | SUIT       | 28        | Probabilistic tractography | W  | =  | NA | =  | ↑  | NA | =  | ↓  | Regularization            |
| Collin et al. <sup>74</sup> (2014)          | 40P vs 51C     | 30.6±6.1    | Medication                   | -   | DTI/1.5T    | FreeSurfer | 68        | Deterministic tractography | W  | ↓  | NA | NA | NA | NA | ↓  | NA | Weaker small-worldization |

**Appendix 1** to Suo X, Lei D, Li L, et al. Psychoradiological patterns of small-world properties and a systematic review of connectome studies of patients with 6 major psychiatric disorders. *J Psychiatry Neurosci* 2018.

DOI: 10.1503/jpn.170214

*Online appendices are unedited and posted as supplied by the authors.*

|                                            |              |           |                                   |   |           |            |     |                            |   |    |    |    |    |    |    |    |                           |
|--------------------------------------------|--------------|-----------|-----------------------------------|---|-----------|------------|-----|----------------------------|---|----|----|----|----|----|----|----|---------------------------|
| Sun et al. <sup>75</sup> (2013)            | 2P vs 2C     | 33        | NA                                | - | DTI/3T    | AAL        | 90  | Deterministic tractography | W | ↓  | =  | NA | ↑  | =  | NA | ↓  | Weaker small-worldization |
| Cabral et al. <sup>78</sup> (2013)         | 15P vs 15C   | 15.97     | Medication                        | - | DTI/1.5T  | AAL        | 90  | Probabilistic tractography | W | =  | NA | NA | ↓  | NA | NA | ↓  | Randomization             |
| Van den Heuvel et al. <sup>71</sup> (2013) | 48P vs 45C   | 29.4±7.5  | 45 Medication, 3 NA               | - | DTI/3T    | FreeSurfer | 82  | Deterministic tractography | W | =  | =  | NA | NA | =  | ↓  | NA | Regularization            |
|                                            | 41P vs 51C   | 31.2±5.7  | 32 Medication, 6 Drug-naïve, 3 NA | - | DTI/3T    | FreeSurfer | 82  | Deterministic tractography | W | ↓  | =  | NA | NA | =  | ↓  | NA | Weaker small-worldization |
| Ottet et al. <sup>68</sup> (2013)          | 46P vs 48C   | 15.2±4.5  | NA                                | - | DTI/3T    | FreeSurfer | 83  | Deterministic tractography | B | =  | NA | NA | ↑  | NA | ↓  | =  | Regularization            |
| Wang et al. <sup>19</sup> (2012)           | 79P vs 96C   | 37±11     | Medication                        | - | DTI/1.5T  | AAL        | 90  | Deterministic tractography | W | NA | NA | =  | NA | NA | ↓  | NA | Regularization            |
| Zalesky et al. <sup>73</sup> (2011)        | 74P vs 32C   | 38±11     | 67 Medication                     | - | DTI/1.5T  | AAL        | 82  | Deterministic tractography | B | =  | NA | NA | =  | NA | ↓  | =  | Regularization            |
| Van den Heuvel et al. <sup>80</sup> (2010) | 40P vs 40C   | 26.8±5.8  | Medication                        | - | DTI/1.5T  | AAL        | 108 | Deterministic tractography | W | NA | =  | NA | NA | =  | NA | NA | =                         |
| Zhang et al. <sup>18</sup> (2012)          | 101P vs 101C | 36.6±11.5 | Medication                        | - | sMRI/1.5T | AAL        | 78  | Partial correlation        | B | ↑  | NA | NA | ↑  | NA | NA | NA | Regularization            |

Abbreviations: P, patients, C, controls, PFS, patients with familial schizophrenia; PSS, patients with sporadic schizophrenia; AVH, auditory verbal hallucinations; ASL, arterial spin labeling; fMRI, functional magnetic resonance imaging; DTI, diffusion tensor imaging; DSI, diffusion spectrum imaging; sMRI, structural magnetic resonance imaging; AAL, automated anatomical labeling; ICA, independent component analysis; HOA, Harvard-Oxford atlas; DKA, Desikan-Killiany Atlas; SUIT, spatially unbiased infratentorial template; HOSD, Higher-order spatial dependence; B, binary; W, weighted; C<sub>p</sub>, clustering coefficient;  $\gamma$ , normalized clustering coefficient; E<sub>loc</sub>, local efficiency; L<sub>p</sub>, characteristic path length;  $\lambda$ , normalized characteristic path length; E<sub>glob</sub>, global efficiency;  $\sigma$ , small-worldness; NA, not available; =, not different.

**Appendix 1** to Suo X, Lei D, Li L, et al. Psychoradiological patterns of small-world properties and a systematic review of connectome studies of patients with 6 major psychiatric disorders. *J Psychiatry Neurosci* 2018.

DOI: 10.1503/jpn.170214

*Online appendices are unedited and posted as supplied by the authors.*

**Table S2.** Studies investigating the connectome in depression.

| Study                                 | Participants      | Age of patients | Medication                                  | Global signal regression | Modality/<br>MR Scanner | Node definition | Node number | Edge definition     | Network type | Segregation |          |           | Integration |           |            | Small-worldness alteration |                           |
|---------------------------------------|-------------------|-----------------|---------------------------------------------|--------------------------|-------------------------|-----------------|-------------|---------------------|--------------|-------------|----------|-----------|-------------|-----------|------------|----------------------------|---------------------------|
|                                       |                   |                 |                                             |                          |                         |                 |             |                     |              | $C_p$       | $\gamma$ | $E_{loc}$ | $L_p$       | $\lambda$ | $E_{glob}$ |                            | $\sigma$                  |
| Borchardt et al. <sup>83</sup> (2016) | 21MDD vs 22C      | 37.9±11.4       | Medication                                  | No/Yes                   | fMRI/3T                 | AAL             | 95          | Pearson correlation | W            | ↓           | =        | NA        | =           | =         | =          | =                          | Randomization             |
| He et al. <sup>92</sup> (2016)        | 40MDD vs 33C      | 35.2±9.3        | Drug-naïve and medication-free<br>≥ 3 weeks | NA                       | fMRI/3T                 | ICA             | 48          | Pearson correlation | W            | =           | NA       | =         | =           | NA        | =          | NA                         | =                         |
| Manelis et al. <sup>84</sup> (2016)   | 39MDD vs 36C      | 31.5±8.0        | Medication                                  | NA                       | fMRI/3T/                | ICA             | 21          | IMaGES algorithm    | NA           | NA          | NA       | NA        | ↑           | NA        | NA         | NA                         | Regularization            |
| Borchardt et al. <sup>85</sup> (2015) | 12MDD vs 12C      | 42.8±10.6       | Drug-naïve                                  | No                       | fMRI/1.5T               | AAL             | 102         | Pearson correlation | W            | =           | NA       | NA        | ↑           | NA        | =          | =                          | Regularization            |
| Ye et al. <sup>87</sup> (2015)        | 42MDD vs 42C      | 42.1±12.3       | Drug-naïve                                  | Yes                      | fMRI/3T                 | AAL             | 90          | Pearson correlation | B            | NA          | NA       | ↑         | NA          | NA        | =          | NA                         | Regularization            |
| Luo et al. <sup>89</sup> (2015)       | 50MDD vs 50C      | 41.6±12.2       | 17 Medication                               | No                       | fMRI/3T                 | HOA             | 112         | Pearson correlation | W            | ↓           | NA       | NA        | ↑           | NA        | ↓          | =                          | Weaker small-worldization |
| Peng et al. <sup>93</sup> (2014)      | 16MDD vs 16C      | 34.4±6.7        | Drug-naïve                                  | No                       | fMRI/3T                 | AAL             | 90          | Pearson correlation | B            | NA          | =        | =         | NA          | =         | =          | =                          | =                         |
| Park et al. <sup>88</sup> (2014)      | 13MDD vs 12C      | 35.3±9.8        | 12 Medication                               | NA                       | fMRI/1.5T               | AAL             | 73          | Partial correlation | B            | NA          | NA       | ↑         | NA          | NA        | ↓          | NA                         | Regularization            |
| Meng et al. <sup>86</sup> (2014)      | 25MDD vs 25C      | 48.8±14.8       | 24 Medication                               | NA                       | fMRI/3T                 | HOA             | 112         | Wavelet correlation | B            | =           | NA       | NA        | ↑           | NA        | ↓          | =                          | Regularization            |
| Lord et al. <sup>46</sup> (2012)      | 21MDD vs 22C      | 37.9±11.4       | Medication                                  | Yes                      | fMRI/3T                 | AAL             | 95          | Pearson correlation | W            | =           | NA       | NA        | =           | NA        | NA         | =                          | =                         |
| Zhang et al. <sup>13</sup> (2011)     | 30MDD vs 63C      | 36.1±12.3       | Drug-naïve                                  | NA                       | fMRI/3T                 | AAL             | 90          | Partial correlation | B            | =           | =        | =         | ↓           | ↓         | ↑          | =                          | Randomization             |
| Jin et al. <sup>94</sup> (2011)       | 16MDD vs 16C      | 17.1±1.3        | Drug-naïve                                  | NA                       | fMRI/1.5T               | AAL             | 90          | Partial correlation | W            | NA          | NA       | NA        | NA          | NA        | NA         | ↓                          | UD                        |
| Wang et al. <sup>90</sup> (2016)      | 33LLD vs 31C      | 68.2±4.5        | Medication-free ≥ 3 months                  | Yes                      | fMRI/1.5T               | AAL             | 90          | Pearson correlation | B            | =           | =        | ↓         | ↑           | =         | ↓          | =                          | Weaker small-worldization |
| Li et al. <sup>81</sup> (2015)        | 23LLD vs 25C      | 67.8±5.9        | 21 Medication, 2 Drug-naïve                 | Yes                      | fMRI/3T                 | Functional      | 264         | Pearson correlation | B            | =           | NA       | ↓         | =           | NA        | =          | ↓                          | Randomization             |
|                                       | 13LLD-aMCI vs 25C | 71.6±6.5        | 11 Medication, 2 Drug-naïve                 | Yes                      | fMRI/3T                 | Functional      | 264         | Pearson correlation | B            | =           | NA       | ↓         | ↑           | NA        | ↓          | ↓                          | Weaker small-worldization |
| Bohr et al. <sup>91</sup> (2013)      | 14LLD vs 16C      | 76.6±7.7        | Medication                                  | Yes                      | fMRI/3T                 | HOA             | 110         | Pearson correlation | B            | =           | =        | NA        | =           | =         | NA         | =                          | =                         |
| Guo et al. <sup>83</sup> (2014)       | 36TD vs 27C       | 28.4±9.7        | Drug-naïve                                  | NA                       | fMRI/3T                 | AAL             | 90          | Partial correlation | B            | =           | NA       | =         | ↓           | NA        | ↑          | NA                         | Randomization             |
| Wang et al. <sup>98</sup> (2016)      | 76MDD vs 116C     | 36.2±11.3       | Drug-naïve                                  | -                        | sMRI/3T                 | DKA             | 68          | Pearson correlation | B            | =           | ↓        | ↓         | =           | =         | =          | ↓                          | Randomization             |

**Appendix 1** to Suo X, Lei D, Li L, et al. Psychoradiological patterns of small-world properties and a systematic review of connectome studies of patients with 6 major psychiatric disorders. *J Psychiatry Neurosci* 2018.

DOI: 10.1503/jpn.170214

*Online appendices are unedited and posted as supplied by the authors.*

|                                         |               |           |                                     |   |          |            |     |                            |    |    |    |    |    |    |    |    |                             |
|-----------------------------------------|---------------|-----------|-------------------------------------|---|----------|------------|-----|----------------------------|----|----|----|----|----|----|----|----|-----------------------------|
| Singh et al. <sup>100</sup> (2013)      | 93MDD vs 151C | 38.6±11.7 | 46 Medication, 45 Drug-naive        | - | sMRI/3T  | AAL        | 90  | Pearson correlation        | B  | NA | ↓  | NA | NA | ↑  | NA | ↓  | Weaker small-worldization   |
| Mak et al. <sup>95</sup> (2016)         | 33LLD vs 25C  | 73.6±5.2  | Medication                          | - | sMRI/3T  | DKA        | 68  | Pearson correlation        | B  | ↑  | =  | =  | NA | =  | =  | =  | Regularization              |
| Ajilore et al. <sup>97</sup> (2014)     | 53LLD vs 73C  | 69.4±8.5  | Drug-naive and medication-free      | - | sMRI/3T  | FreeSurfer | 82  | Pearson correlation        | B  | NA | ↑  | NA | NA | ↑  | ↓  | ↓  | Regularization              |
|                                         |               |           | ≥ 2 weeks                           |   |          |            |     |                            |    |    |    |    |    |    |    |    |                             |
| Lim et al. <sup>105</sup> (2013)        | 37LLD vs 40C  | 71.8±4.8  | 2 Medication                        | - | sMRI/3T  | AAL        | 90  | Pearson correlation        | B  | NA | =  | NA | NA | =  | NA | =  | =                           |
| Chen et al. <sup>101</sup> (2016)       | 27MDD vs 40C  | 33.0±8.8  | NA                                  | - | DTI/3T   | AAL        | 90  | Deterministic tractography | W  | ↓  | =  | ↓  | =  | =  | ↓  | =  | Weaker small-worldization   |
| Chen et al. <sup>47</sup> (2016)        | 16MDD vs 30C  | 44.8±2.2  | Medication                          | - | DTI/1.5T | AAL        | 90  | GQI tractography           | B  | ↑  | NA | ↑  | ↑  | NA | NA | =  | Regularization              |
| Sacchet et al. <sup>108</sup> (2015)    | 14MDD vs 18C  | 35.6±8.4  | 3 Medication                        | - | DTI/3T   | DKA        | 68  | Probabilistic tractography | B  | NA | NA | NA | =  | NA | =  | =  | =                           |
| Qin et al. <sup>106</sup> (2014)        | 29MDD vs 30C  | 39.0±10.0 | NA                                  | - | DTI/1.5T | AAL        | 396 | Deterministic tractography | W  | =  | NA | =  | NA | NA | =  | NA | =                           |
| Korgaonkar et al. <sup>110</sup> (2014) | 95MDD vs 102C | 33.8±13.1 | Drug-naive and medication-free      | - | DTI/3T   | DKA        | 84  | Probabilistic tractography | W  | =  | NA | NA | =  | NA | =  | NA | =                           |
|                                         |               |           | ≥ 5 half-lives                      |   |          |            |     |                            |    |    |    |    |    |    |    |    |                             |
| Sacchet et al. <sup>107</sup> (2014)    | 14MDD vs 18C  | NA        | NA                                  | - | DTI/3T   | FreeSurfer | 68  | Probabilistic tractography | B  | NA | NA | NA | =  | NA | =  | =  | =                           |
| Ajilore et al. <sup>103</sup> (2014)    | 43MDD vs 40C  | 57.4±11.9 | Drug-naive and medication ≥ 2 weeks | - | DTI/3T   | FreeSurfer | 87  | Deterministic tractography | NA | NA | NA | =  | NA | NA | =  | NA | =                           |
| Tymofiyeva et al. <sup>109</sup> (2017) | 57MDD vs 41C  | 16.2±1.3  | 10 Medication, 41 Drug-naive        | - | DTI/3T   | AAL        | 90  | Deterministic tractography | W  | NA | =  | NA | NA | =  | NA | =  | =                           |
| Li et al. <sup>99</sup> (2017)          | 24LLD vs 24C  | 69.7±7.0  | 11 Medication                       | - | DTI/3T   | AAL        | 90  | Probabilistic tractography | W  | ↓  | NA | =  | =  | NA | =  | NA | Randomization               |
| Charlton et al. <sup>104</sup> (2015)   | 28LLD vs 48C  | 65.3±7.2  | Medication-free ≥ 2 weeks           | - | DTI/3T   | FreeSurfer | 87  | Deterministic tractography | NA | NA | =  | NA | NA | =  | =  | NA | =                           |
| Bai et al. <sup>96</sup> (2012)         | 35LLD vs 30C  | 67.9±4.5  | Medication-free ≥ 3 months          | - | DTI/1.5T | AAL        | 90  | Deterministic tractography | W  | =  | =  | =  | ↑  | =  | ↓  | =  | Regularization              |
| Long et al. <sup>102</sup> (2015)       | 22TD vs 19C   | 28.1±9.9  | Drug-naive                          | - | DTI/1.5T | AAL        | 90  | Deterministic tractography | B  | =  | ↓  | ↑  | ↓  | ↓  | ↑  | ↓  | Stronger small-worldization |

Abbreviations: MDD, major depressive disorder; LLD, late-life depression; aMCI, amnesic mild cognitive impairment; TD, treatment-naive depression; C, controls, fMRI, functional magnetic resonance imaging; sMRI, structural magnetic resonance imaging; DTI, diffusion tensor imaging; AAL, automated anatomical labeling; ICA, independent component analysis; HOA, Harvard-Oxford atlas; DKA, Desikan-Killiany Atlas; GQI, Generalized q-sampling imaging; B, binary; W, weighted; C<sub>p</sub>, clustering coefficient; γ, normalized clustering coefficient; E<sub>loc</sub>, local efficiency; L<sub>p</sub>, characteristic path length; λ, normalized characteristic path length; E<sub>glob</sub>, global efficiency; σ, small-worldness; NA, not available; =, not different; UD, undefined.

**Appendix 1** to Suo X, Lei D, Li L, et al. Psychoradiological patterns of small-world properties and a systematic review of connectome studies of patients with 6 major psychiatric disorders. *J Psychiatry Neurosci* 2018.

DOI: 10.1503/jpn.170214

*Online appendices are unedited and posted as supplied by the authors.*

**Table S3.** Studies investigating the connectome in ADHD, BD, OCD and PTSD.

| Study                                     | Participants    | Age of patients | Medication                               | Global signal regression | Modality/<br>MR Scanner | Node definition | Node number | Edge definition            | Network type | Segregation |          |           | Integration |           |            | Small-worldness alteration |                           |
|-------------------------------------------|-----------------|-----------------|------------------------------------------|--------------------------|-------------------------|-----------------|-------------|----------------------------|--------------|-------------|----------|-----------|-------------|-----------|------------|----------------------------|---------------------------|
|                                           |                 |                 |                                          |                          |                         |                 |             |                            |              | $C_p$       | $\gamma$ | $E_{loc}$ | $L_p$       | $\lambda$ | $E_{glob}$ |                            | $\sigma$                  |
| <b>ADHD</b>                               |                 |                 |                                          |                          |                         |                 |             |                            |              |             |          |           |             |           |            |                            |                           |
| Wang et al. <sup>111</sup> (2009)         | 19P-I+C vs 20C  | 13.6±1.5        | NA                                       | Yes                      | fMRI/3T                 | AAL             | 90          | Pearson correlation        | B            | NA          | NA       | ↑         | NA          | NA        | =          | NA                         | Regularization            |
| Xia et al. <sup>112</sup> (2014)          | 22P-C vs 22C    | 11.6±2.9        | 9 Medication-free for 48 hours           | Yes                      | fMRI/3T                 | AAL             | 68          | Pearson correlation        | B            | NA          | NA       | ↓         | NA          | NA        | =          | NA                         | Randomization             |
| Cocchi et al. <sup>113</sup> (2012)       | 16P vs 15C      | 23.8±1.0        | Drug-naïve                               | NA                       | fMRI/3T                 | AAL             | 90          | Pearson correlation        | B            | =           | =        | NA        | =           | =         | NA         | =                          | =                         |
| Cao et al. <sup>114</sup> (2013)          | 30P-I+C vs 30C  | 10.3±1.9        | Drug-naïve                               | -                        | DTI/3T                  | AAL             | 90          | Probabilistic tractography | W            | =           | =        | =         | ↑           | ↑         | ↓          | NA                         | Regularization            |
| Sidlauskaitė et al. <sup>115</sup> (2015) | 18P-I+C vs 21C  | 30.1±9.8        | 9 Medication-free ≥ 24 hours             | -                        | DTI/3T                  | AAL             | 116         | Deterministic tractography | B            | =           | =        | NA        | NA          | =         | =          | =                          | =                         |
| <b>BD</b>                                 |                 |                 |                                          |                          |                         |                 |             |                            |              |             |          |           |             |           |            |                            |                           |
| Manelis et al. <sup>84</sup> (2016)       | 31P-I vs 36C    | 33.4±8.4        | Medication                               | NA                       | fMRI/3T                 | ICA             | 21          | IMaGES algorithm           | NA           | NA          | NA       | NA        | ↑           | NA        | NA         | NA                         | Regularization            |
| He et al. <sup>92</sup> (2016)            | 13P-I+II vs 33C | 35.2±10.3       | Drug-naïve and Medication-free ≥ 3 weeks | NA                       | fMRI/3T                 | ICA             | 48          | Pearson correlation        | W            | =           | NA       | =         | =           | NA        | =          | NA                         | =                         |
| Spielberg et al. <sup>116</sup> (2016)    | 60P-I+II vs 30C | 33.0±10.0       | Medication-free ≥ 2 weeks                | NA                       | fMRI/3T                 | Craddock atlas  | 181         | Pearson correlation        | W            | ↑           | NA       | NA        | NA          | NA        | ↓          | NA                         | Regularization            |
| Collin et al. <sup>117</sup> (2016)       | 216P-I vs 144C  | 47.4±12.1       | 93 Medication, 109 Drug-naïve<br>14 NA   | -                        | DTI/3T                  | DKA             | 219         | Deterministic tractography | W            | NA          | NA       | NA        | NA          | NA        | ↓          | NA                         | Regularization            |
| Leow et al. <sup>118</sup> (2013)         | 25P-I vs 24C    | 41.6±12.7       | 23 Medication, 2 Drug-naïve              | -                        | DTI/3T                  | FreeSurfer      | 87          | Deterministic tractography | W            | ↓           | NA       | NA        | ↑           | NA        | ↓          | NA                         | Weaker small-worldization |
| <b>OCD</b>                                |                 |                 |                                          |                          |                         |                 |             |                            |              |             |          |           |             |           |            |                            |                           |
| Zhang et al. <sup>12</sup> (2011)         | 18P vs 16C      | 23.3±5.0        | 13 Medication                            | Yes                      | fMRI/3T                 | AAL             | 90          | Pearson correlation        | B            | NA          | ↑        | NA        | NA          | =         | NA         | NA                         | Regularization            |
| Shin et al. <sup>119</sup> (2014)         | 25P vs 23C      | 26.3±6.2        | Drug-naïve                               | Yes                      | fMRI/3T                 | Functional ROI  | 142         | Pearson correlation        | W            | NA          | ↓        | ↓         | NA          | =         | =          | ↓                          | Randomization             |
| Jung et al. <sup>120</sup> (2017)         | 61P vs 61C      | 26.1±7.2        | Drug-naïve                               | NA                       | fMRI/3T                 | AAL             | 17          | Pearson correlation        | B            | NA          | ↓        | NA        | NA          | ↓         | NA         | ↓                          | Randomization             |
| Armstrong et al. <sup>121</sup> (2016)    | 21P vs 20C      | 12.7±2.8        | 18 Drug-naïve, 2 Medication              | NA                       | fMRI/3T                 | HOA             | 100         | Pearson correlation        | B            | NA          | NA       | NA        | NA          | NA        | =          | ↓                          | UD                        |

**Appendix 1** to Suo X, Lei D, Li L, et al. Psychoradiological patterns of small-world properties and a systematic review of connectome studies of patients with 6 major psychiatric disorders. *J Psychiatry Neurosci* 2018.

DOI: 10.1503/jpn.170214

*Online appendices are unedited and posted as supplied by the authors.*

|                                      |            |           |                                                            |     |           |                 |     |                            |   |    |    |    |    |    |    |    |                             |  |
|--------------------------------------|------------|-----------|------------------------------------------------------------|-----|-----------|-----------------|-----|----------------------------|---|----|----|----|----|----|----|----|-----------------------------|--|
|                                      |            |           | 1 Medication-free                                          |     |           |                 |     |                            |   |    |    |    |    |    |    |    |                             |  |
| Zhong et al. <sup>122</sup> (2014)   | 26P vs 39C | 28.8±7.6  | Drug-naïve                                                 | -   | DTI/3T    | AAL             | 90  | Deterministic tractography | W | =  | ↑  | =  | ↑  | ↑  | ↓  | =  | Regularization              |  |
| Reess et al. <sup>123</sup> (2016)   | 41P vs 42C | 32.5±10.0 | 29 Medication, 12 Drug-naïve and medication-free ≥ 3 weeks | -   | DTI/3T    | Freesurfer      | 83  | Deterministic tractography | W | NA | =  | NA | NA | =  | NA | NA | =                           |  |
| Kim et al. <sup>124</sup> (2013)     | 32P vs 35C | 24.8±6.4  | 23 Drug-naïve, 9 Medication-free for ≥ 4 weeks             | -   | sMRI/1.5T | Destrieux atlas | 148 | Partial correlation        | B | NA | NA | =  | NA | NA | =  | NA | =                           |  |
| <b>PTSD</b>                          |            |           |                                                            |     |           |                 |     |                            |   |    |    |    |    |    |    |    |                             |  |
| Lei et al. <sup>11</sup> (2015)      | 76P vs 76C | 42.1±10.1 | Drug-naïve                                                 | Yes | fMRI/3T   | AAL             | 90  | Partial correlation        | B | ↑  | =  | ↑  | ↓  | =  | ↑  | =  | Stronger small-worldization |  |
| Suo et al. <sup>125</sup> (2015)     | 24P vs 24C | 13.0±1.8  | Drug-naïve                                                 | Yes | fMRI/3T   | AAL             | 90  | Partial correlation        | B | ↑  | =  | ↑  | =  | ↑  | =  | =  | Regularization              |  |
| Long et al. <sup>126</sup> (2013)    | 17P vs 15C | 30.8±8.7  | Medication-free ≥ 2 months                                 | -   | DTI/3T    | AAL             | 90  | Deterministic tractography | W | =  | =  | =  | ↓  | ↓  | =  | =  | Randomization               |  |
| Suo et al. <sup>127</sup> (2017)     | 24P vs 23C | 13.0±1.7  | Drug-naïve                                                 | -   | DTI/3T    | AAL             | 90  | Deterministic tractography | B | =  | =  | ↓  | ↑  | =  | ↓  | =  | Weaker small-worldization   |  |
| Mueller et al. <sup>128</sup> (2015) | 40P vs 45C | 32.7±7.7  | 9 Medication                                               | -   | sMRI/3T   | FreeSurfer      | 80  | Pearson correlation        | B | =  | NA | NA | NA | NA | =  | ↓  | UD                          |  |

Abbreviations: ADHD, attention-deficit/hyperactivity disorder; P-I, patients with ADHD inattentive type; P-C, patients with ADHD combined type; P, patients; C, controls; BD, bipolar disorder; P-I, patients with BD type I; P-II, patients with BD type II; OCD, obsessive-compulsive disorder; PTSD, posttraumatic stress disorder; fMRI, functional magnetic resonance imaging; DTI, diffusion tensor imaging; sMRI, structural magnetic resonance; AAL, automated anatomical labeling; ICA, independent component analysis; DKA, Desikan-Killiany Atlas; ROI, regions of interest; HOA, Harvard-Oxford atlas; B, binary; W, weighted; C<sub>p</sub>, clustering coefficient;  $\gamma$ , normalized clustering coefficient; E<sub>loc</sub>, local efficiency; L<sub>p</sub>, characteristic path length;  $\lambda$ , normalized characteristic path length; E<sub>glob</sub>, global efficiency;  $\sigma$ , small-worldness; NA, not available; =, not different; UD, undefined.
